# Supplementary material for: Fermentative Production of Fructo-Oligosaccharides Using Aureobasidium pullulans: Effect of Dissolved Oxygen Concentration and Fermentation Mode
Source: MDPI journal article supplement (doi:10.3390/molecules26133867), 2021-06-24
Supplement: s1 [file s1]

# Fermentative Production of Fructo-Oligosaccharides Using *Aureobasidium Pullulans*: Effect of Dissolved Oxygen Concentration and Fermentation Mode

Xinquan Liang <sup>1,2</sup>, Chenglin Li <sup>1,2</sup>, Weifeng Cao <sup>2,3,\*</sup>, Weilei Cao <sup>2,3</sup>, Fei Shen <sup>2,3</sup> and Yinhua Wan <sup>2,3</sup>

<sup>1</sup> Department of Sugar Engineering, College of Light Industry and Food Engineering, Guangxi University, Nanning 530004, China; lxq10713@163.com (X.L.); a860835337@gmail.com (C.L.)

<sup>2</sup> State Key Laboratory of Biochemical Engineering, Institute of Process Engineering, Chinese Academy of Sciences, Beijing 100190, China; lxq10713@163.com (X.L.); a860835337@gmail.com (C.L.); wfcao@ipe.ac.cn (W.C.); wlcao@foxmol.com (W.C.); fshen@ipe.ac.cn (F.S.); yhwang@ipe.ac.cn (Y.W.)

<sup>3</sup> School of Chemical Engineering, University of Chinese Academy of Sciences, Beijing 100049, China; wfcao@ipe.ac.cn (W.C.); wlcao@foxmol.com (W.C.); fshen@ipe.ac.cn (F.S.); yhwang@ipe.ac.cn (Y.W.)

\* Correspondence: wfcao@ipe.ac.cn; Tel./Fax: +86-10-62650673

**Citation:** Liang, X.; Li, C.; Cao, W.; Cao, W.; Shen, F.; Wan, Y. Fermentative Production of Fructo-Oligosaccharides Using *Aureobasidium pullulans*: Effect of Dissolved Oxygen Concentration and Fermentation Mode. *Molecules* **2021**, *26*, 3867. <https://doi.org/10.3390/molecules26133867>

Academic Editor: Yasuhiro Ozeki

Received: 26 May 2021

Accepted: 22 June 2021

Published: 24 June 2021

**Publisher's Note:** MDPI stays neutral with regard to jurisdictional claims in published maps and institutional affiliations.

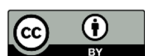

**Copyright:** © 2021 by the authors. Licensee MDPI, Basel, Switzerland. This article is an open access article distributed under the terms and conditions of the Creative Commons Attribution (CC BY) license (<http://creativecommons.org/licenses/by/4.0/>).

## 1. Enzyme Assay

During the cultivation, 5 mL of the culture broth was centrifuged using a table-top centrifuge (5000 rpm) for 10 min at room temperature and the supernatant was collected for the determination of extracellular enzyme activity. The cells centrifuged from the 5 mL culture broth were washed and resuspended up to 5 mL with saline and then used for the determination of intracellular enzyme activity. One unit (1 U) defined as the amount of enzyme activity required to produce 1  $\mu$ mol of glucose/min under the following conditions: (a) pH 5.5, (b) temperature 55 °C, (c) reaction time 1 h, (d) reaction mixture consisting of the following composition: 7.5 mL of sucrose 800 g/L, 2.3 mL of 0.1 M citrate buffer (pH 5.5), and 0.2 mL enzyme sample. The enzyme reaction was stopped by heating at 100 °C for 15 min and the released glucose from the enzyme reaction was measured by a HPLC apparatus (LC20AT, Shimadzu, Japan) equipped with a RI-detector using the Asahipak NH2P-50 4E column (Shodex, Japan).

## 2. The Procedure for DO Electrode Calibration

Briefly, the procedure for DO electrode calibration involved reducing the pO<sub>2</sub> in the saturated sodium sulfite solution to zero and then following the increase in pO<sub>2</sub> over time after the resumption of aeration and stirring speed, until maximum O<sub>2</sub> saturation was reached in the sterilized broth before inoculation under pH 5.5, 25 °C and air saturation at 1 atm. The maximum O<sub>2</sub> saturation value, 8.9 mg L<sup>-1</sup> achieved at aeration rate 10 Lmin<sup>-1</sup> and stirring speed 1000 rpm, was calibrated as 100% of the DO probe. Then DO value detected by the DO probe in the fermentation process was the relative value compared with the calibration.

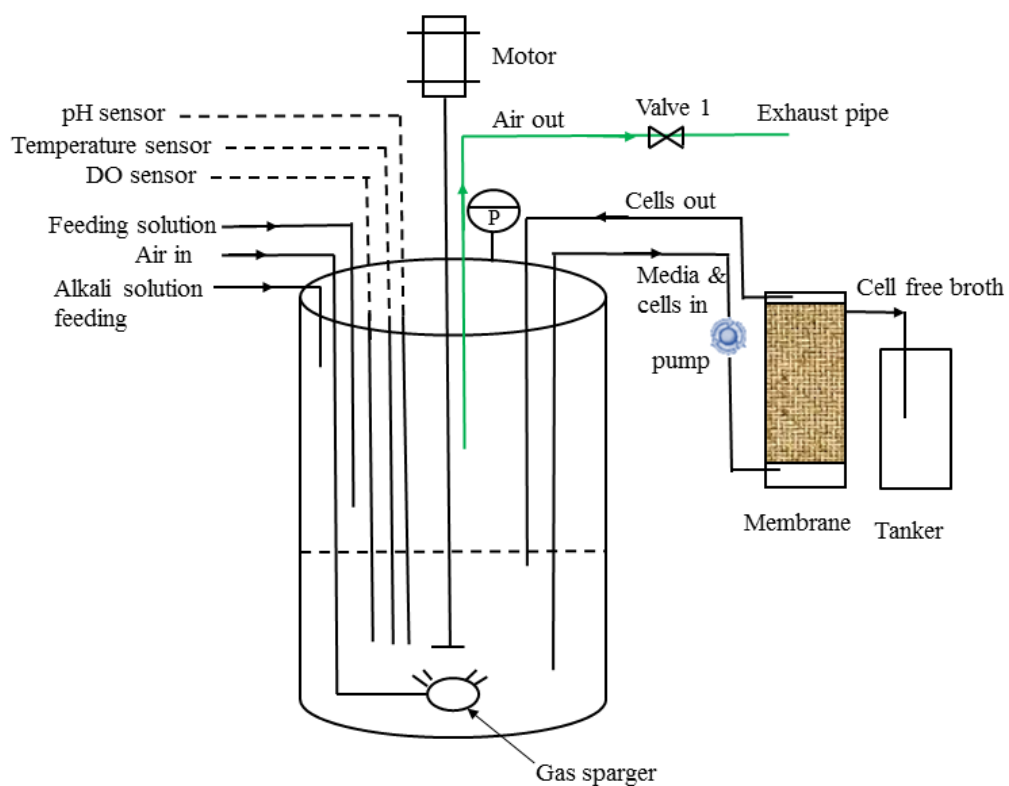

**Figure S1.** Schematic diagram of the membrane system for FOS production in a membrane bioreactor.
